# Supplementary material for: Enhanced Synaptic Behaviors in Chitosan Electrolyte-Based Electric-Double-Layer Transistors with Poly-Si Nanowire Channel Structures
Source: MDPI journal article supplement (doi:10.3390/biomimetics8050432), 2023-09-18
Supplement: s1 [file s1]

# **Supplementary Information**

## **Enhanced Synaptic Behaviors in Chitosan Electrolyte-Based Electric-Double-Layer Transistors with Poly-Si Nanowire Channel Structures**

*Dong-Hee Lee<sup>1</sup>, Hwi-Su Kim<sup>1</sup>, Ki-Woong Park<sup>1</sup>, Hamin Park<sup>2</sup> and Won-Ju Cho<sup>1,\*</sup>*

<sup>1</sup>Department of Electronic Materials Engineering, Kwangwoon University, Seoul 01897, Korea

<sup>2</sup>Department of Electronic Engineering, Kwangwoon University, Seoul 01897, Korea

\* Correspondence to: chowj@kw.ac.kr

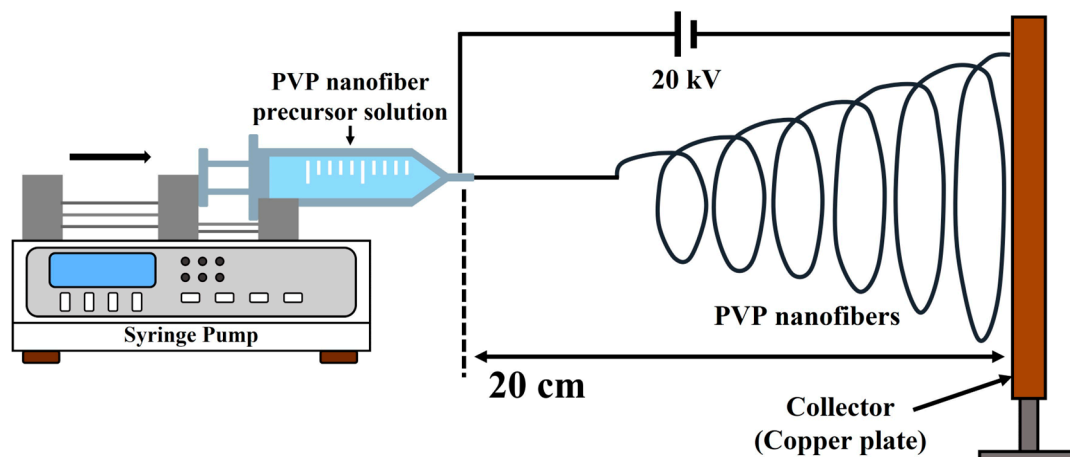

**Figure S1.** Schematic illustration of electrospinning equipment.

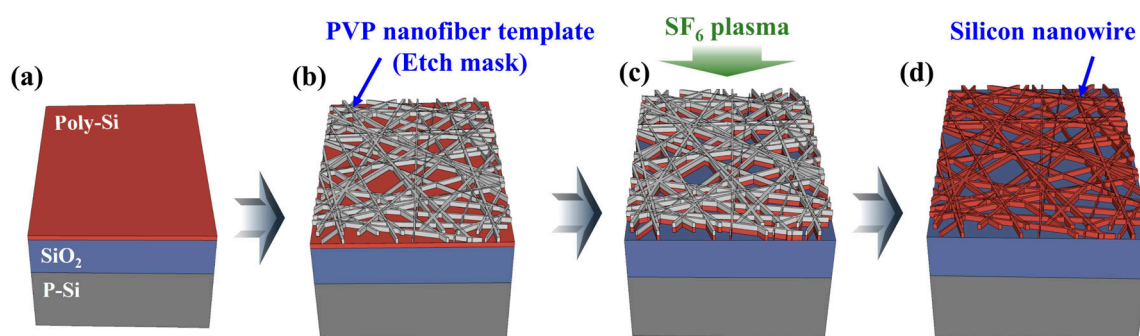

**Figure S2.** Schematic diagram of the process sequence for poly-Si nanowire channel.

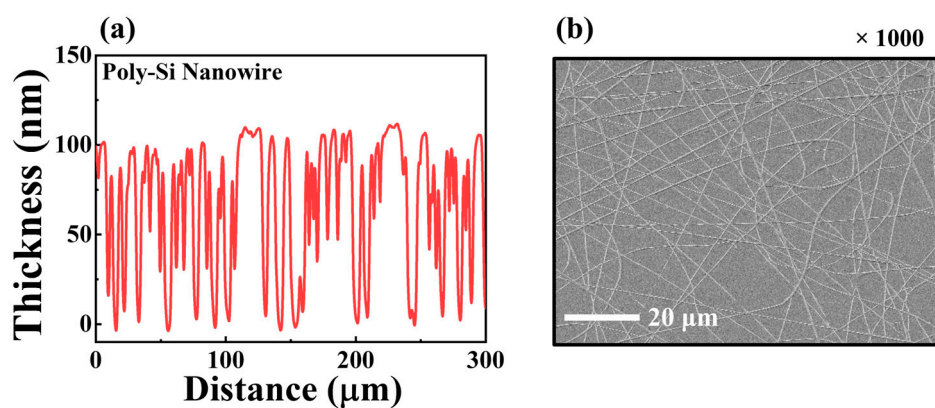

**Figure S3.** (a) Roughness profile and (b) scanning electron microscopy (SEM) image of the

poly-Si nanowire (NW) channel.

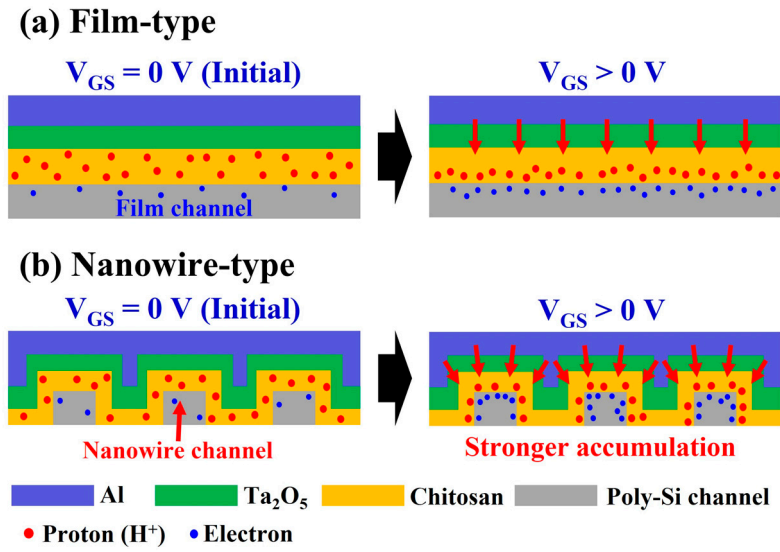

**Figure S4.** Schematic diagram of proton migration upon applying positive gate voltage in (a) film-type channel and (b) NW-type channel.

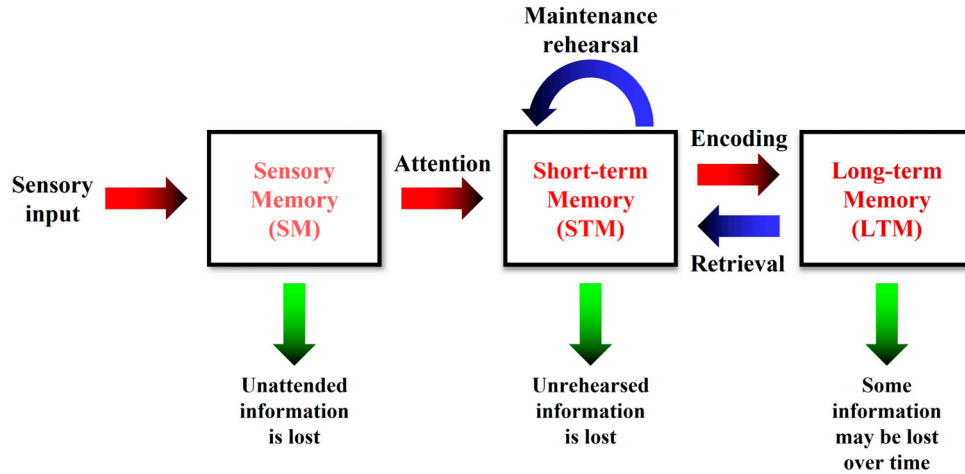

**Figure S5.** Schematic illustration of the typical model for transitioning from STM to LTM.

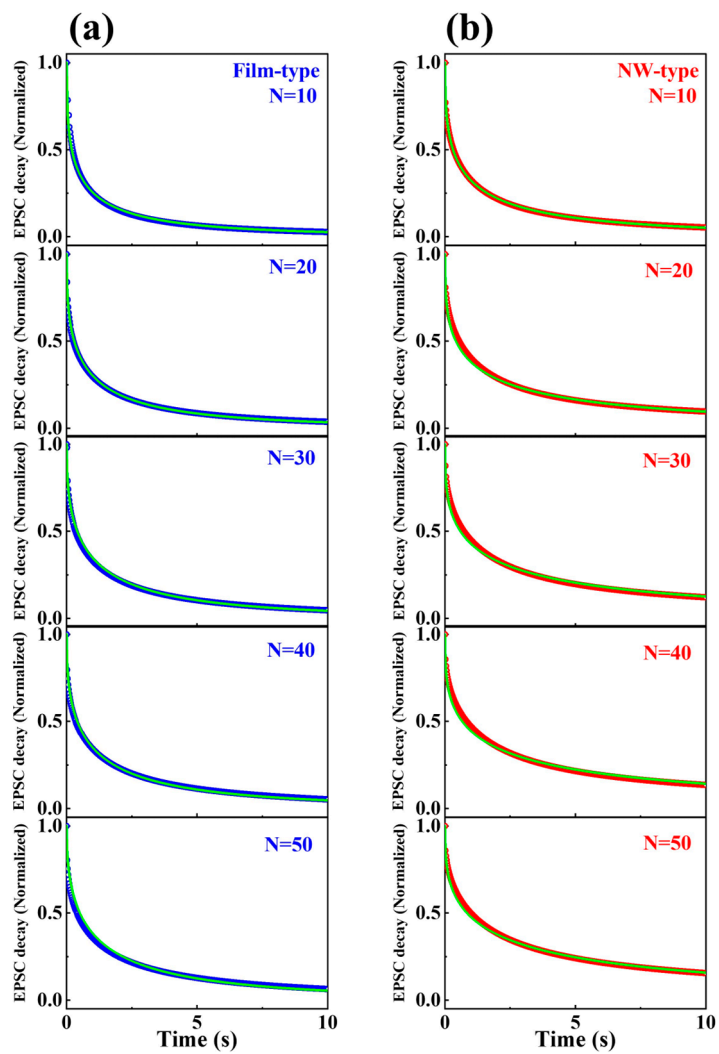

**Figure S6.** Fitting of synaptic weight decay in (a) film-type and (b) NW-type synaptic transistors.
